# Supplementary material for: Favourable Experience with M-Mode Sonography in the Diagnosis of Pneumothorax in Two Patients with Thoracic Subcutaneous Emphysema
Source: Case Rep Radiol. 2014 Nov 13;2014:906127. doi: 10.1155/2014/906127 (PMC4247942; doi:10.1155/2014/906127)
Supplement: Supplementary file 1 — Case1: Real time B-mode sonography using a linear transducer positioned in the mid-clavicular line at the 3rd intercostal space. Case 2: Real time B-mode sonography using a linear transducer positioned in the mid-clavicular line at the 3rd intercostal space [file 906127.f1.zip]

Archive with 2 entries (2 files):
- 02.33.10_Std.___-0003678-_CRIRAD_1178330.mp4
- Case_2_CRIRAD_1178331.avi
